# Supplementary material for: Ozone–NO x –VOC Sensitivity of the Lake Michigan Region Inferred from TROPOMI Observations and Ground-Based Measurements
Source: Copernicus journal article supplement (doi:10.5194/egusphere-2022-1154), 2022-12-09
Supplement: Supplementary file [file egusphere-2022-1154-AC3-supplement.pdf]

**Table S1.** Dates of 2019, 2020, and 2021 O<sub>3</sub> exceedance days in the Chicago-Naperville-Elgin, Illinois-Indiana-Wisconsin, core-based statistical area (hereafter the Chicago metropolitan area, or “CMA” for short). An O<sub>3</sub> exceedance day is defined as having at least one ground monitor in the U.S. EPA Air Quality System (AQS) measuring a maximum daily 8-hour average (MDA8) O<sub>3</sub> value greater than 70 parts per billion (ppb). The “# stations” column indicates how many monitors in the CMA measured an exceedance.

| 2019                           |            |             | 2020                           |            |             | 2021                           |            |             |
|--------------------------------|------------|-------------|--------------------------------|------------|-------------|--------------------------------|------------|-------------|
| Dates                          | # stations | Day of week | Dates                          | # stations | Day of week | Dates                          | # stations | Day of week |
| 5-Jun                          | 4          | Wed         | 4-Jun                          | 5          | Thu         | 22-May                         | 1          | Sat         |
| 26-Jun                         | 1          | Wed         | 5-Jun                          | 10         | Fri         | 3-Jun                          | 14         | Thu         |
| 28-Jun                         | 1          | Fri         | 8-Jun                          | 3          | Mon         | 4-Jun                          | 5          | Fri         |
| 29-Jun                         | 6          | Sat         | 16-Jun                         | 2          | Tue         | 11-Jun                         | 5          | Fri         |
| 1-Jul                          | 1          | Mon         | 17-Jun                         | 15         | Wed         | 17-Jun                         | 5          | Thu         |
| 3-Jul                          | 3          | Wed         | 18-Jun                         | 20         | Thu         | 18-Jun                         | 8          | Fri         |
| 5-Jul                          | 1          | Fri         | 19-Jun                         | 16         | Fri         | 20-Jul                         | 5          | Tue         |
| 8-Jul                          | 1          | Mon         | 27-Jun                         | 2          | Sat         | 22-Jul                         | 6          | Thu         |
| 9-Jul                          | 12         | Tue         | 1-Jul                          | 4          | Wed         | 23-Jul                         | 4          | Fri         |
| 13-Jul                         | 1          | Sat         | 2-Jul                          | 1          | Thu         | 26-Jul                         | 2          | Mon         |
| 25-Jul                         | 2          | Thu         | 3-Jul                          | 14         | Fri         | 27-Jul                         | 1          | Tue         |
| 2-Aug                          | 2          | Fri         | 6-Jul                          | 14         | Mon         | 28-Jul                         | 5          | Wed         |
| 3-Aug                          | 3          | Sat         | 7-Jul                          | 6          | Tue         | 4-Aug                          | 3          | Wed         |
| <b>Total: 13 days</b>          |            |             | 8-Jul                          | 3          | Wed         | 7-Aug                          | 2          | Sat         |
| <b>10 weekdays, 3 weekends</b> |            |             | 9-Jul                          | 4          | Thu         | 23-Aug                         | 1          | Mon         |
|                                |            |             | 17-Jul                         | 2          | Fri         | 25-Aug                         | 6          | Wed         |
|                                |            |             | 25-Jul                         | 5          | Sat         | 26-Aug                         | 4          | Thu         |
|                                |            |             | 7-Aug                          | 1          | Fri         | 27-Aug                         | 4          | Fri         |
|                                |            |             | 15-Aug                         | 4          | Sat         | 13-Sep                         | 1          | Mon         |
|                                |            |             | 21-Aug                         | 3          | Fri         | 1-Oct                          | 3          | Fri         |
|                                |            |             | <b>Total: 20 days</b>          |            |             | <b>Total: 20 days</b>          |            |             |
|                                |            |             | <b>17 weekdays, 3 weekends</b> |            |             | <b>18 weekdays, 2 weekends</b> |            |             |

**Table S2.** Distribution of the number of CMA O<sub>3</sub> exceedance days by year and day of week. The last two columns report the percentage of exceedances that occurred on weekdays and weekends for that row’s time period.

| CMA ozone exceedance day of week distribution |        |         |           |          |        |          |        |          |          |          |
|-----------------------------------------------|--------|---------|-----------|----------|--------|----------|--------|----------|----------|----------|
| Year(s)                                       | Monday | Tuesday | Wednesday | Thursday | Friday | Saturday | Sunday | All days | Weekdays | Weekends |
| 2019                                          | 2      | 1       | 3         | 1        | 3      | 3        | 0      | 13       | 77 %     | 23 %     |
| 2020                                          | 2      | 2       | 3         | 4        | 6      | 3        | 0      | 20       | 85 %     | 15 %     |
| 2021                                          | 3      | 2       | 3         | 4        | 6      | 2        | 0      | 20       | 90 %     | 10 %     |
| All years                                     | 7      | 5       | 9         | 9        | 15     | 8        | 0      | 53       | 85 %     | 15 %     |

**Table S3.** Kolmogorov-Smirnov (K-S) test results for comparison of the ozone season and CMA exceedance days composites. For each variable, 1000 K-S tests were performed using a random subsampling approach at the 98 % confidence level. In the “median p-value” column, values <0.001 are represented as 0, and bolded values indicate overall statistically significant results (median p-value <0.020). The “wind divergence – tails” variable refers to only subsampling values greater or less than one standard deviation from the mean wind divergence value. \*Sig. diff. = significant difference

| <b>2-subsample K-S test results: ozone season vs. CMA exceedance days</b> |                                               |                       |                         |                       |
|---------------------------------------------------------------------------|-----------------------------------------------|-----------------------|-------------------------|-----------------------|
| <b>Variable</b>                                                           | <b>Percentage of tests with a *sig. diff.</b> | <b>Median p-value</b> | <b>Full sample size</b> | <b>Subsample size</b> |
| HCHO bias corrected                                                       | 100 %                                         | <b>0.000</b>          | 1146                    | 286                   |
| NO <sub>2</sub>                                                           | 100 %                                         | <b>0.000</b>          | 1146                    | 286                   |
| FNR bias corrected                                                        | 100 %                                         | <b>0.000</b>          | 1146                    | 286                   |
| Wind divergence                                                           | 1.8 %                                         | 0.117                 | 880                     | 220                   |
| Wind divergence – tails                                                   | 97.1 %                                        | <b>0.001</b>          | 241                     | 60                    |
| 2-m temperature                                                           | 100 %                                         | <b>0.000</b>          | 1242                    | 310                   |

**Table S4.** Kolmogorov-Smirnov (K-S) test results for comparison of the weekday and weekend composites. For each variable, 1000 K-S tests were performed using a random subsampling approach at the 98 % confidence level. In the “median p-value” column, values <0.001 are represented as 0, and bolded values indicate overall statistically significant results (median p-value <0.020). The “wind divergence – tails” variable refers to only subsampling values greater or less than one standard deviation from the mean wind divergence value. \*Sig. diff. = significant difference

| <b>2-subsample K-S test results: weekdays vs. weekends</b> |                                               |                       |                         |                       |
|------------------------------------------------------------|-----------------------------------------------|-----------------------|-------------------------|-----------------------|
| <b>Variable</b>                                            | <b>Percentage of tests with a *sig. diff.</b> | <b>Median p-value</b> | <b>Full sample size</b> | <b>Subsample size</b> |
| HCHO bias corrected                                        | 100 %                                         | <b>0.000</b>          | 1146                    | 286                   |
| NO <sub>2</sub>                                            | 71.9 %                                        | <b>0.013</b>          | 1146                    | 286                   |
| FNR bias corrected                                         | 100 %                                         | <b>0.000</b>          | 1146                    | 286                   |
| Wind divergence                                            | 0 %                                           | 0.607                 | 880                     | 220                   |
| Wind divergence – tails                                    | 0 %                                           | 0.821                 | 241                     | 60                    |
| 2-m temperature                                            | 65.5 %                                        | 0.023                 | 1242                    | 310                   |

## 2019–2020–2021 TROPOMI composite HCHO values

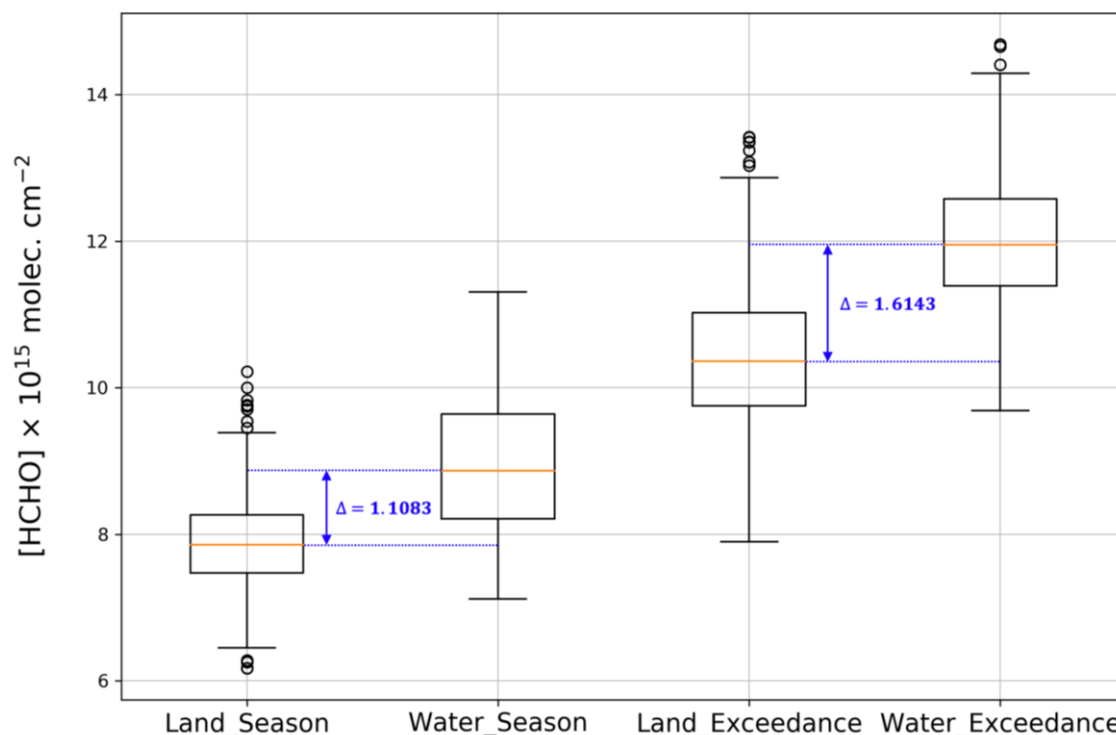

**Figure S1.** Boxplot distributions of TROPOMI HCHO vertical column densities (VCDs) for the O<sub>3</sub> season and CMA exceedance day composites separated by over land and over water values. The mean of each distribution is represented by an orange horizontal line. The difference in means between the over land and over water values ( $\Delta$ ) is the “over water bias value”.

**Table S5.** HCHO absolute and relative over water bias values for the O<sub>3</sub> season and CMA exceedance day composites. The absolute over water bias value is calculated by subtracting the mean over HCHO land value from the mean HCHO over water value. The relative over water bias value is calculated as  $\left(\frac{HCHO_{water\_mean} - HCHO_{land\_mean}}{HCHO_{land\_mean}}\right) \times 100\%$ .

| Composite category  | Absolute over water bias                        | Relative over water bias |
|---------------------|-------------------------------------------------|--------------------------|
| Ozone season        | $1.1083 \times 10^{15}$ molec. cm <sup>-2</sup> | +14.05 %                 |
| CMA exceedance days | $1.6143 \times 10^{15}$ molec. cm <sup>-2</sup> | +15.51 %                 |

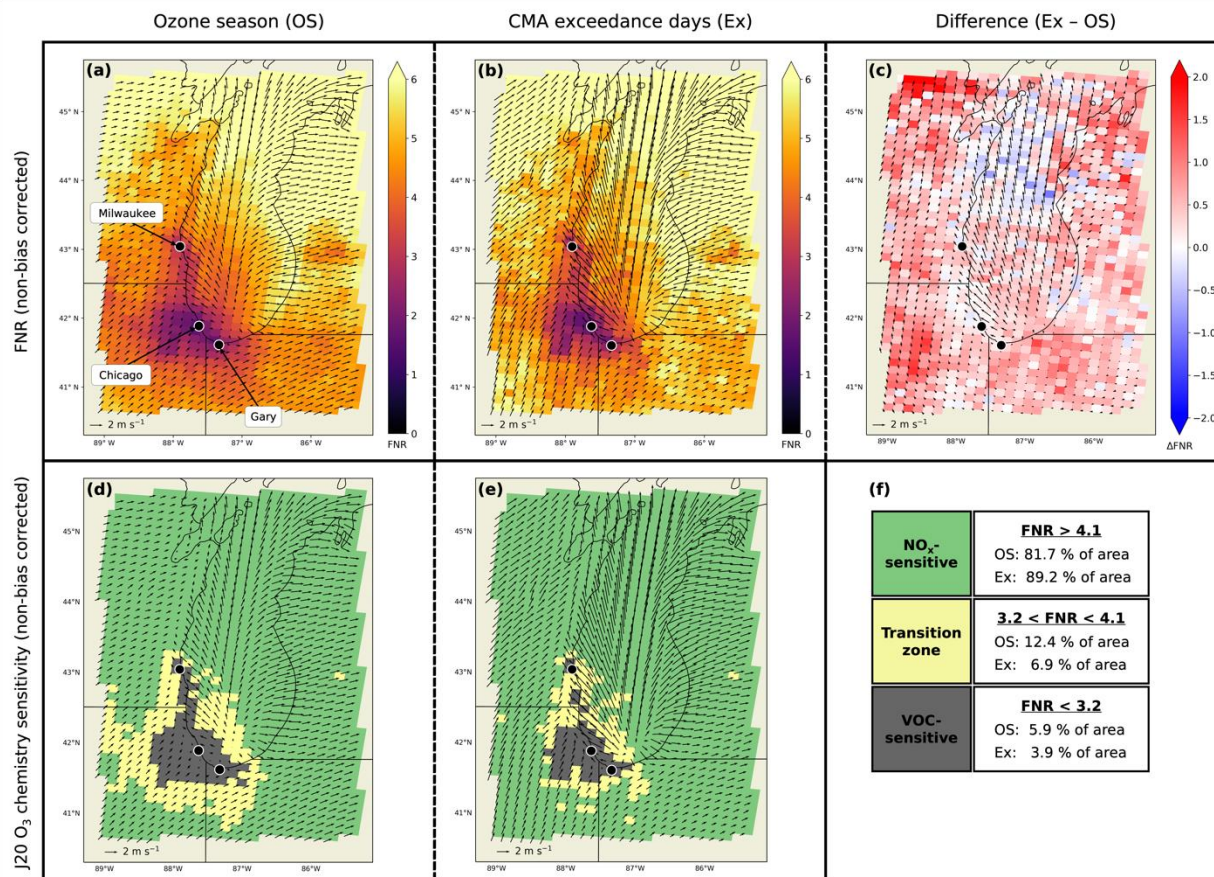

**Figure S2.** TROPOMI-derived 2019–2021 FNR values (calculated using non-bias corrected HCHO values) in the Lake Michigan region during: (a) the ozone season (OS), (b) CMA exceedance days (Ex), and (c) the difference between them (Ex – OS). Jin et al. (2020; “J20”) threshold interpretation of 2019–2021 ozone chemistry sensitivity (using non-bias corrected FNR values) during: (d) the ozone season, (e) CMA exceedance days, and (f) the percent of the domain area classified as each J20 sensitivity regime. Mean 10-meter winds are represented by arrows.

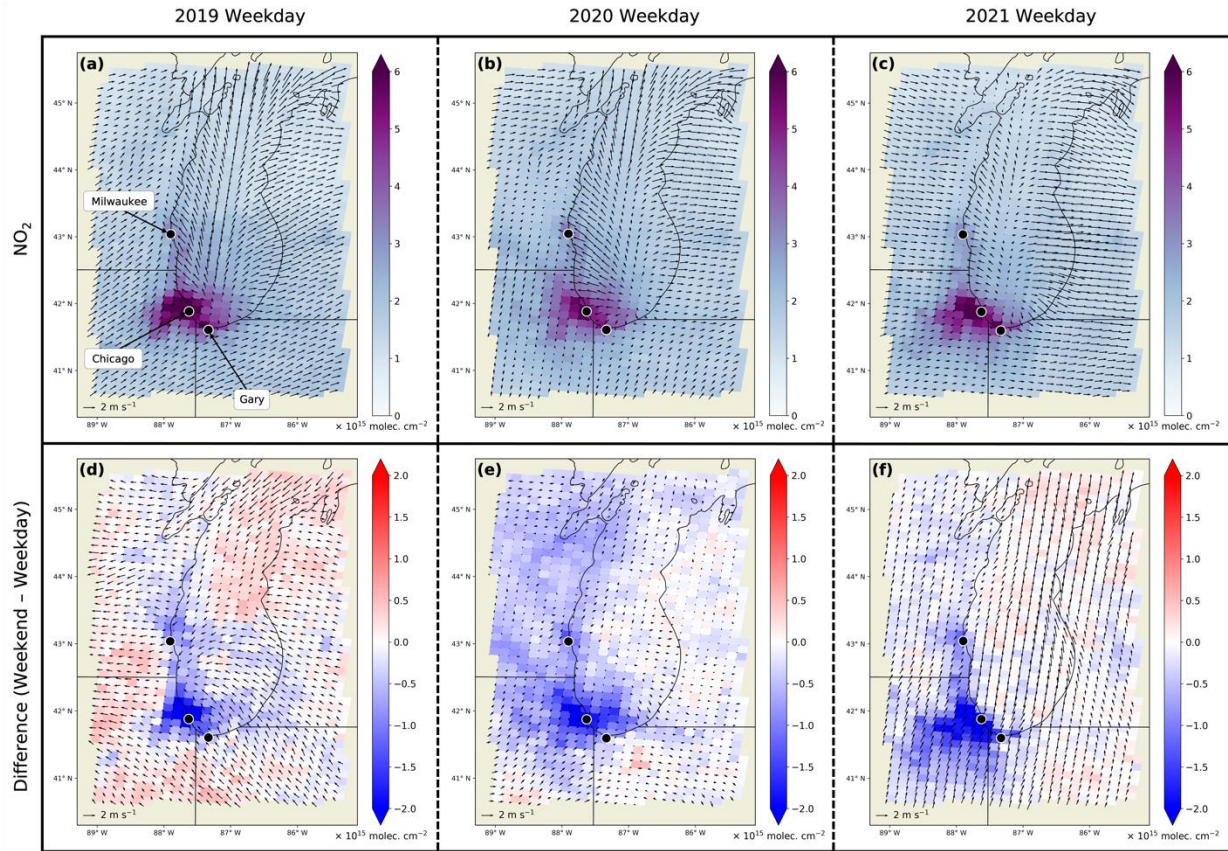

**Figure S3.** TROPOMI-derived composites of mean weekday tropospheric NO<sub>2</sub> VCDs in the Lake Michigan region during: (a) 2019, (b) 2020, and (c) 2021. The difference between weekday and weekend tropospheric NO<sub>2</sub> VCDs in the Lake Michigan region during: (d) 2019, (e) 2020, and (f) 2021. Mean 10-meter winds are represented by arrows.

## 2019–2020–2021 TROPOMI composite HCHO values

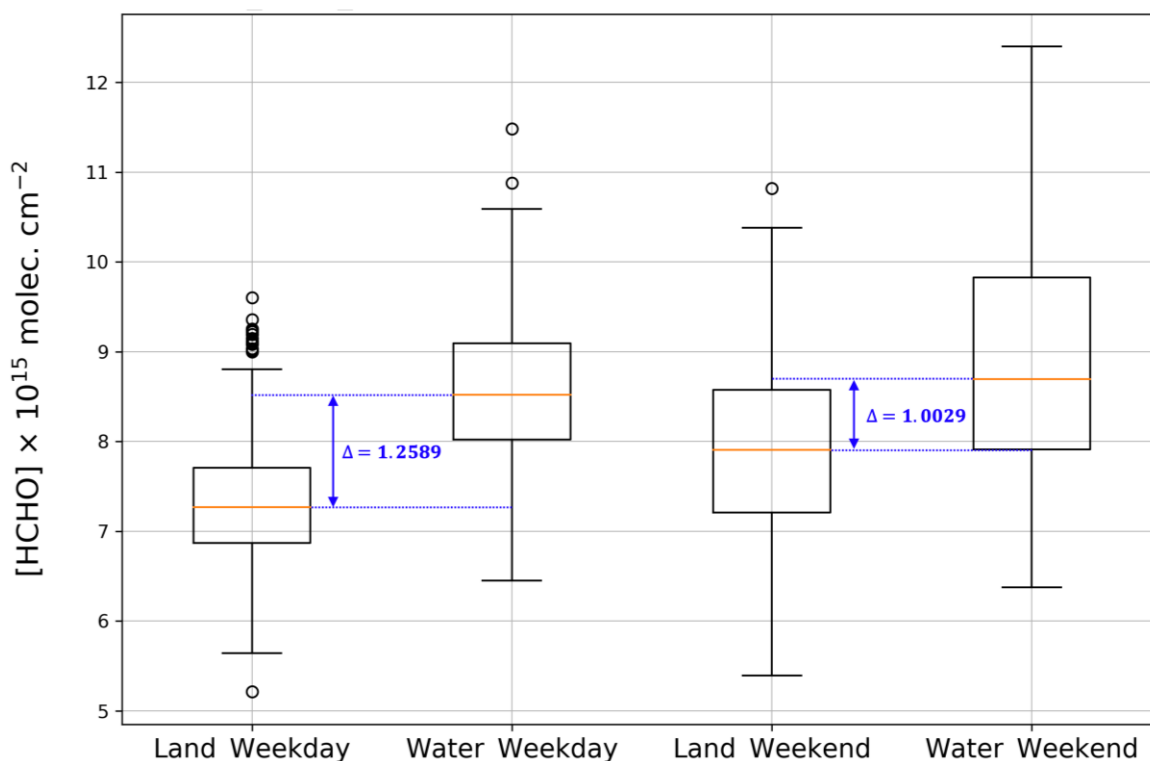

**Figure S4.** Boxplot distributions of TROPOMI HCHO VCDs for the weekday and weekend composites separated by over land and over water values. The mean of each distribution is represented by an orange horizontal line. The difference in means between the over land and over water values ( $\Delta$ ) is the “over water bias value”.

**Table S6.** HCHO absolute and relative over water bias values for the weekday and weekend composites. The absolute over water bias value is calculated by subtracting the mean over HCHO land value from the mean HCHO over water value. The relative over water bias value is calculated as  $\left(\frac{HCHO_{water\_mean} - HCHO_{land\_mean}}{HCHO_{land\_mean}}\right) \times 100\%$ .

| Composite category | Absolute over water bias                        | Relative over water bias |
|--------------------|-------------------------------------------------|--------------------------|
| Weekday            | $1.2589 \times 10^{15}$ molec. cm <sup>-2</sup> | +17.2 %                  |
| Weekend            | $1.0029 \times 10^{15}$ molec. cm <sup>-2</sup> | +12.7 %                  |



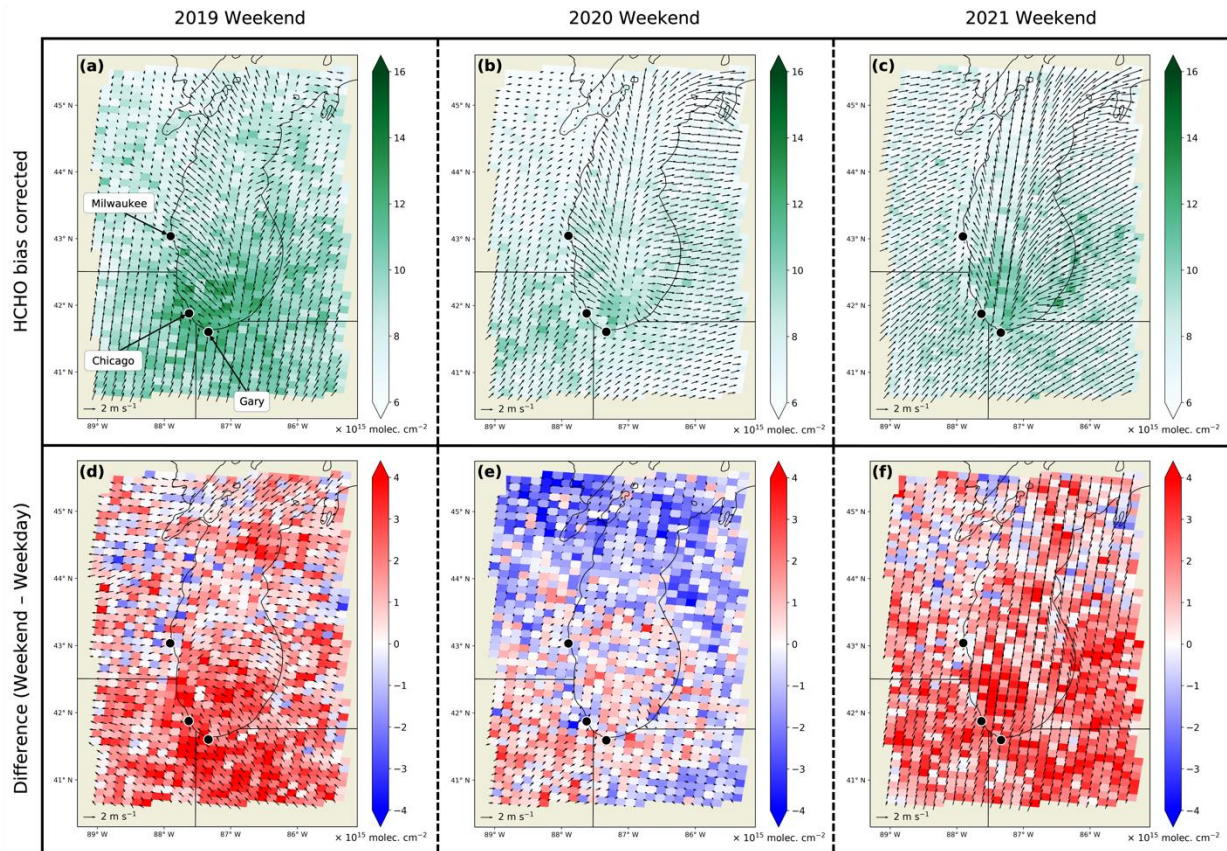

**Figure S5.** TROPOMI-derived composites of mean weekend tropospheric HCHO VCDs in the Lake Michigan region during: (a) 2019, (b) 2020, and (c) 2021. The difference between weekday and weekend tropospheric HCHO VCDs in the Lake Michigan region during: (d) 2019, (e) 2020, and (f) 2021. Mean 10-meter winds are represented by arrows.

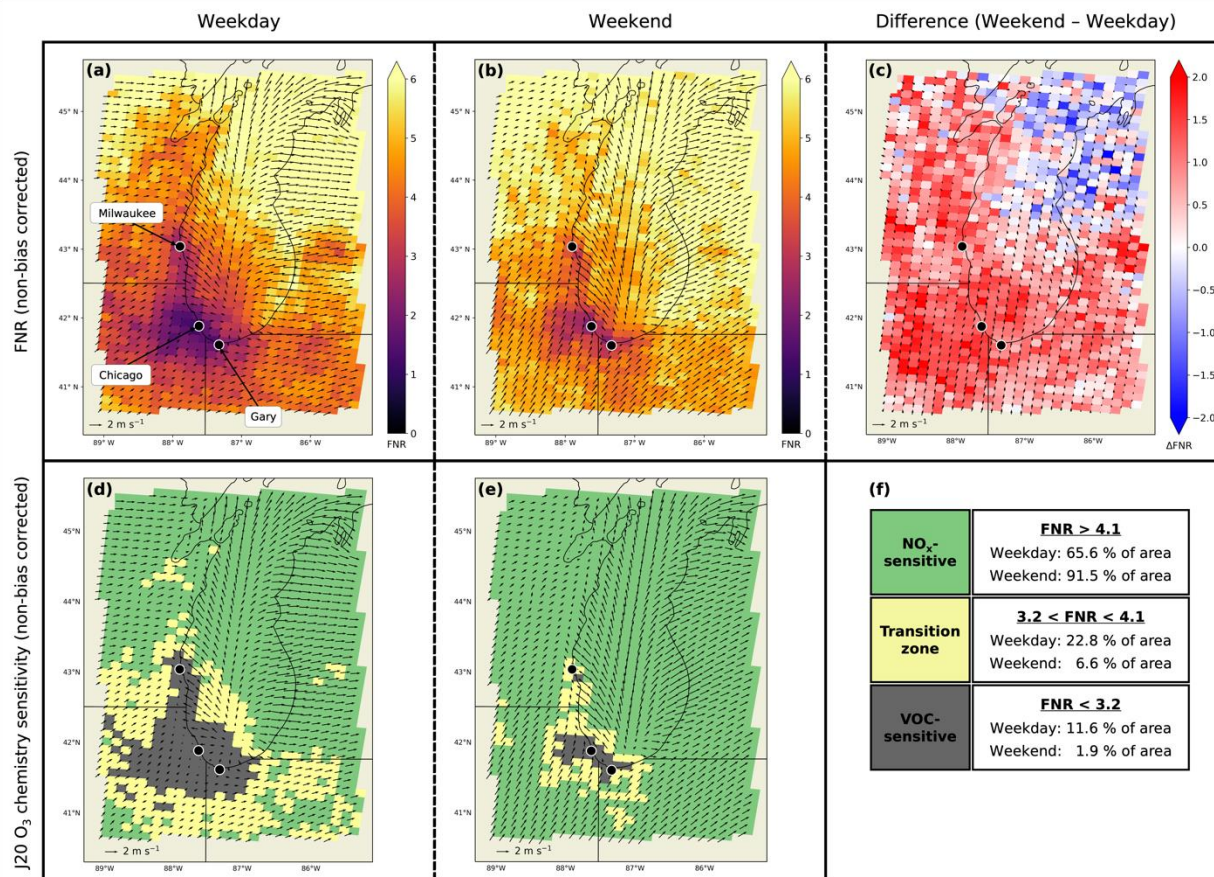

**Figure S6.** TROPOMI-derived 2019–2021 FNR values (calculated using non-bias corrected HCHO values) in the Lake Michigan region during: (a) weekdays, (b) weekends, and (c) the difference between them (weekend – weekday). J20 threshold interpretation of 2019–2021 ozone chemistry sensitivity (using non-bias corrected FNR values) during: (d) weekdays, (e) weekends, and (f) the percent of the domain area classified as each J20 sensitivity regime. Mean 10-meter winds are represented by arrows.
